# Supplementary material for: Receptor-interacting protein kinase 1 is a key mediator in TLR3 ligand and Smac mimetic-induced cell death and suppresses TLR3 ligand-promoted invasion in cholangiocarcinoma
Source: PubMed Central journal article supplement (PMC7545934; doi:10.1186/s12964-020-00661-3), 2020-10-09
Supplement: 12964_2020_661_MOESM2_ESM.pdf [file 12964_2020_661_MOESM2_ESM.pdf]

## Supplementary Information

### **Receptor-interacting protein kinase 1 is a key mediator in TLR3 ligand and Smac mimetic-induced cell death and suppresses TLR3 ligand-promoted invasion in cholangiocarcinoma**

Thanpisit Lomphithak<sup>1</sup>, Swati Choksi<sup>2</sup>, Apiwat Mutirangura<sup>3</sup>, Rutaiwan Tohtong<sup>4</sup>,  
Tewin Tencomnao<sup>5</sup>, Hajime Usubuchi<sup>6</sup>, Michiaki Unno<sup>7</sup>, Hironobu Sasano<sup>6</sup>,  
Siriporn Jitkaew<sup>5\*</sup>

#### **\*Corresponding author:**

Dr. Siriporn Jitkaew

Address: Age-Related Inflammation and Degeneration Research Unit, Department of  
Clinical Chemistry, Faculty of Allied Health Sciences, Chulalongkorn University,  
Bangkok, 10330, Thailand.

Email address: Siriporn.ji@chula.ac.th

Tel: (66) 022181081, Fax: (66) 022181082

Table of Content:

Supplementary Figures 1-15

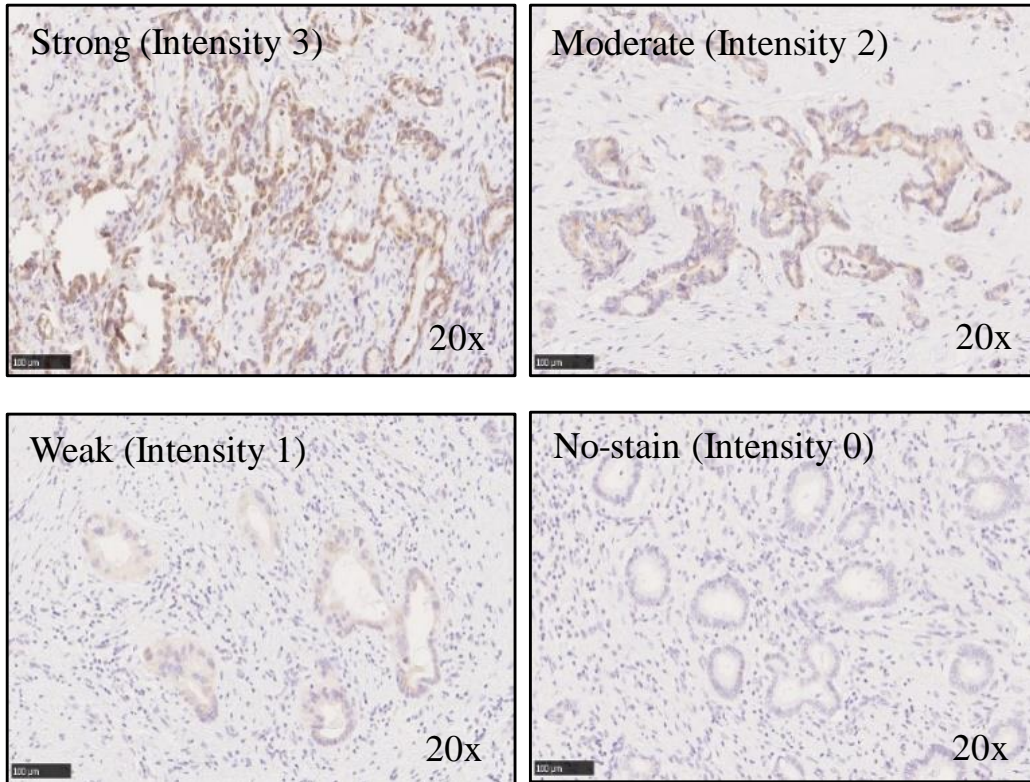

**Fig. S1.** The representative immunohistochemical staining of TLR3 scored as 3 for strong staining, 2 for moderate staining, 1 for weak staining and 0 for no staining.

A

## Poly (I:C) Direct Treatment

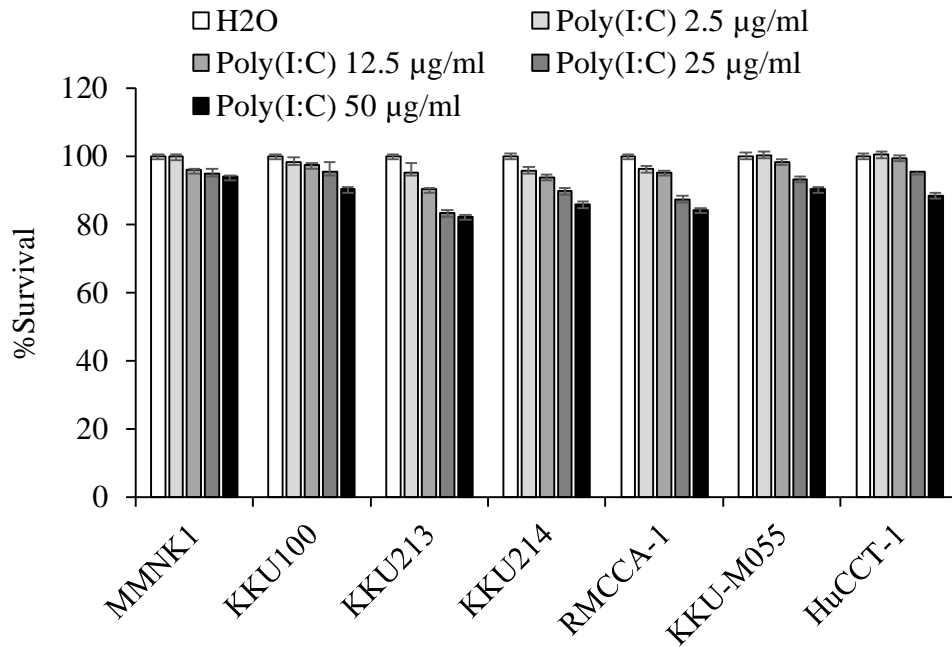

B

## Poly (I:C) Transfection

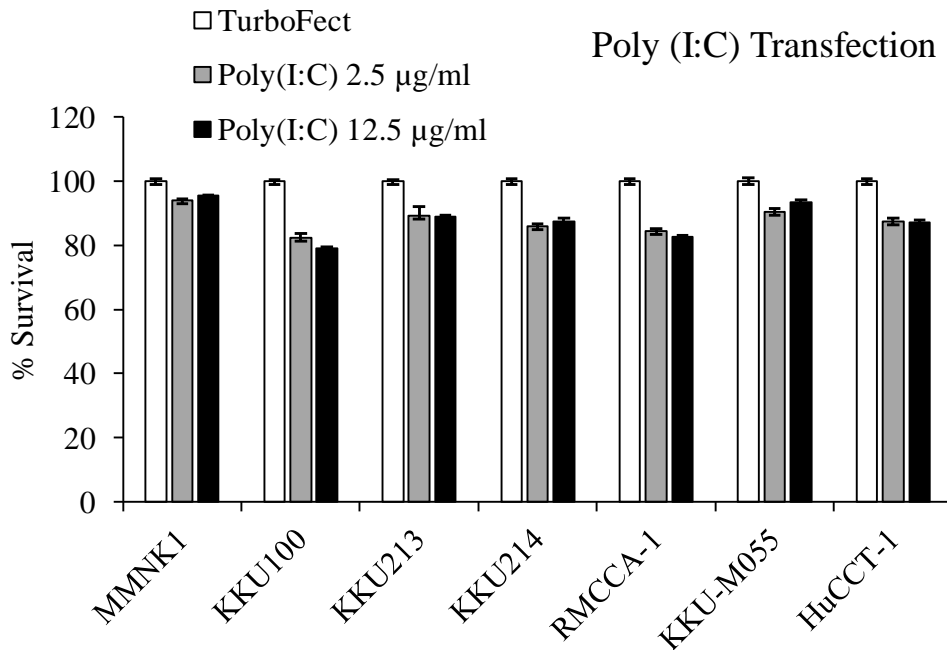

**Fig. S2. The sensitivity of CCA cell lines to Poly(I:C) transfection and direct treatment.** Six CCA cell lines and a nontumor cholangiocyte, MMNK1 were directly treated with different concentrations of Poly(I :C) at 2.5, 12.5, 25, and 50 µg/ml (A) or transfected with TurboFect or two different concentrations of Poly(I :C) at 2.5 µg/ml and 12.5 µg/ml (B) for 48 h. Cell viability was measured by MTT assay and % survival was calculated by normalizing Poly(I:C) treatment to vehicle control (H<sub>2</sub>O) or TurboFect transfection reagent. Data from two independent experiments was presented as mean ± S.D.

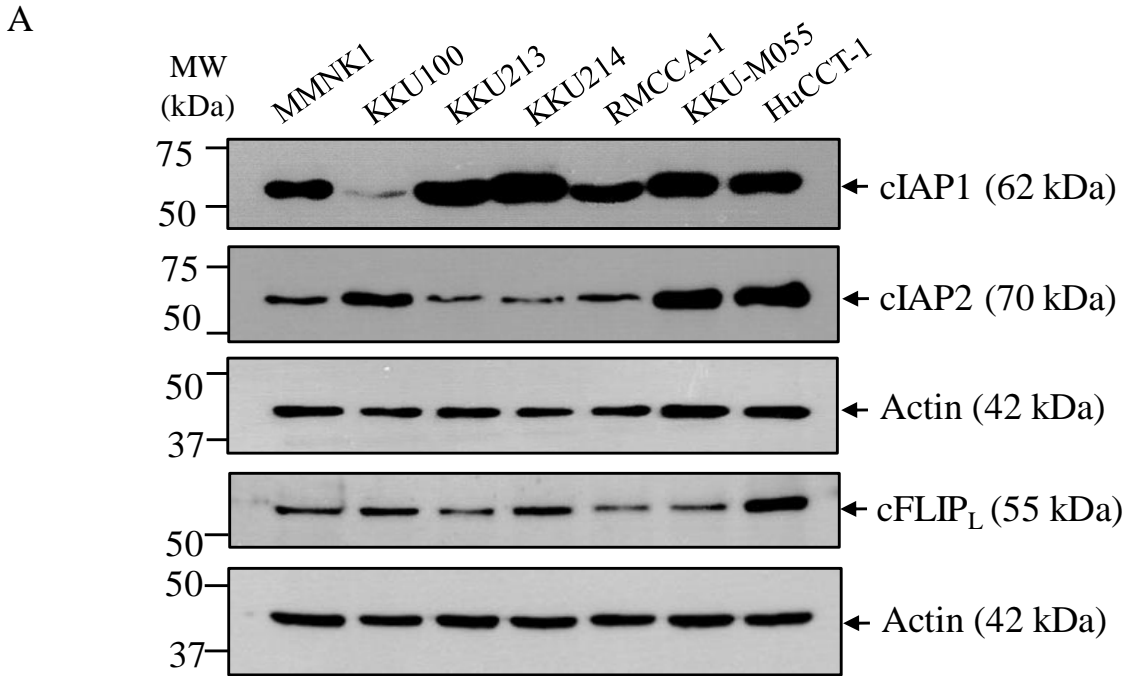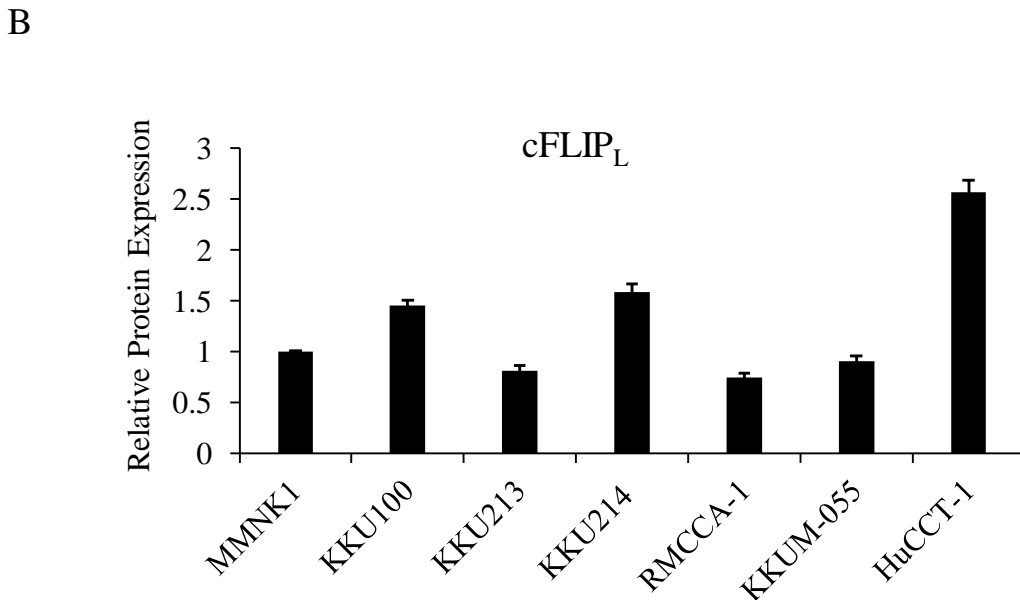

**Fig. S3. The expression of cIAP1, cIAP2, and cFLIP<sub>L</sub>.** (A) Six CCA cells and a nontumor cholangiocyte, MMNK1 cell lysates were collected and subjected to Western blot analysis.  $\beta$ -actin was served as loading control. (B) cFLIP<sub>L</sub> was normalized to actin protein expression, and presented as fold increase relative to MMNK1 with its mean set to 1.

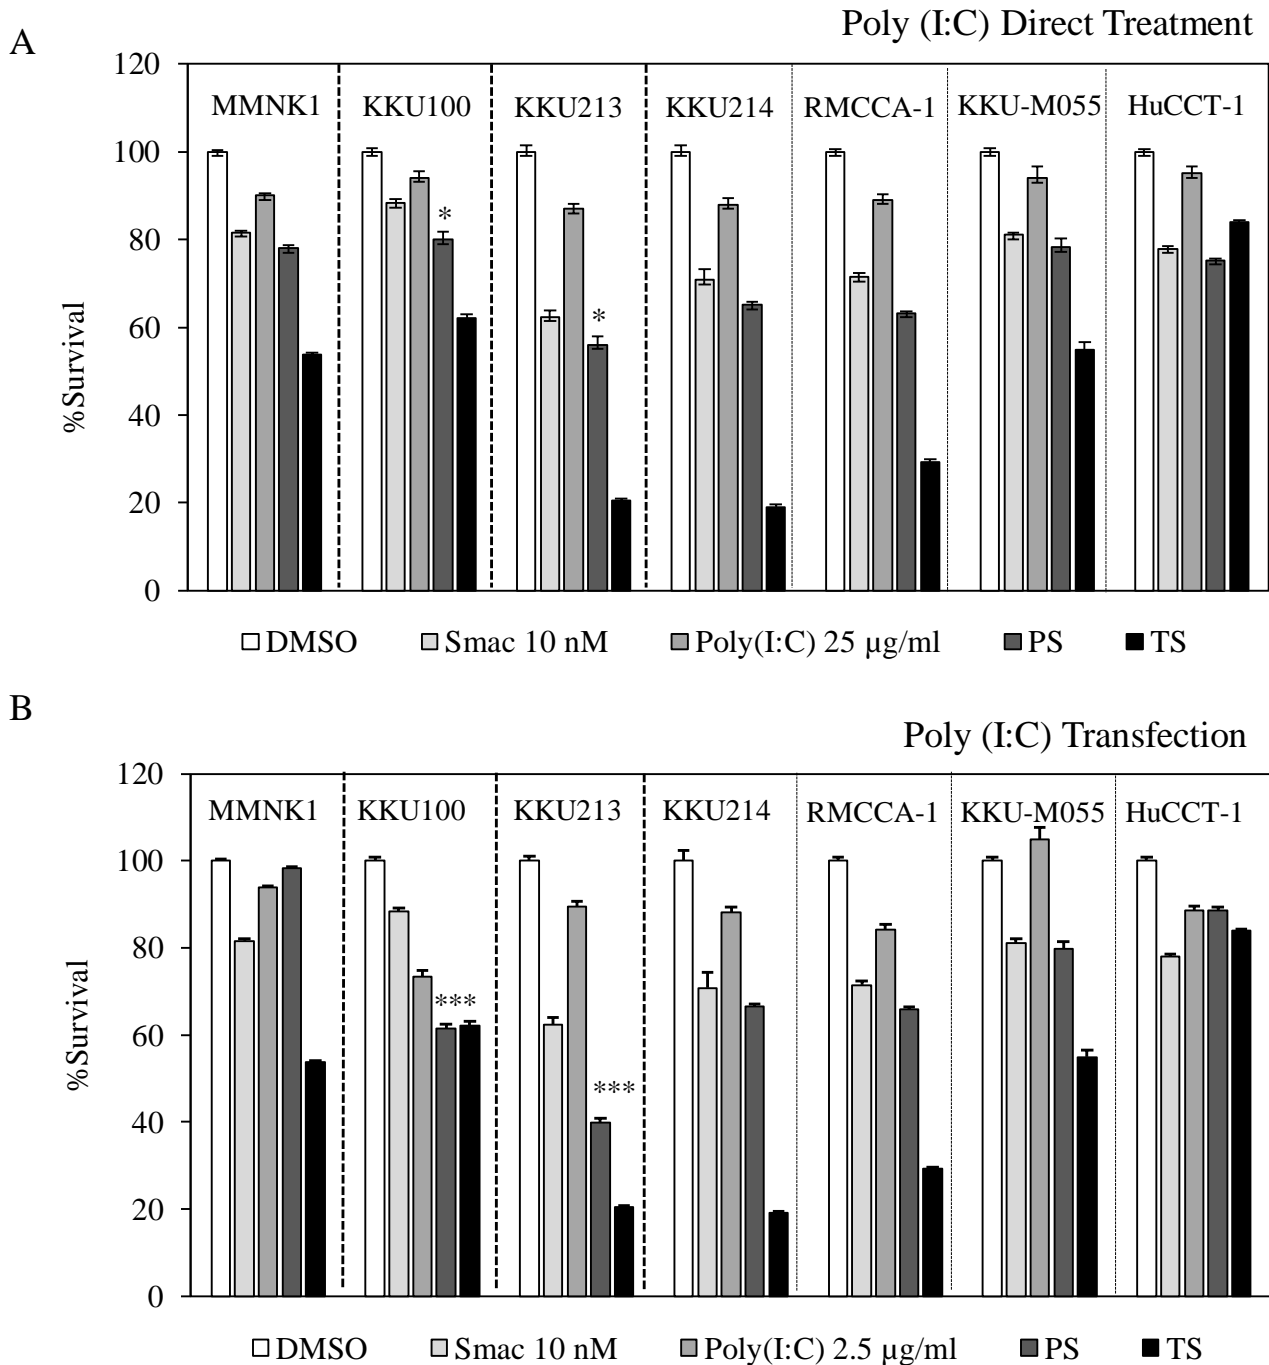

**Fig. S4. The effect of Poly(I:C) and Smac mimetic combination treatment on cell death induction in CCA cell lines.** Six different CCA cell lines and a nontumor cholangiocyte (MMNK1) were pretreated with 10 nM Smac mimetic (SM-164) for 2 h and were directly treated with 25 µg/ml Poly(I:C) (A) or were transfected with 2.5 µg/ml Poly(I:C) (B) for 24 h. TNF-α at 10 ng/ml and Smac mimetic at 10 nM (TS) were included as a positive control. Cell viability was determined by MTT assay. Data from two independent experiments was presented as mean ± S.D.; \*  $p < 0.05$ , \*\*  $p < 0.01$ , \*\*\*  $p < 0.001$ .

A

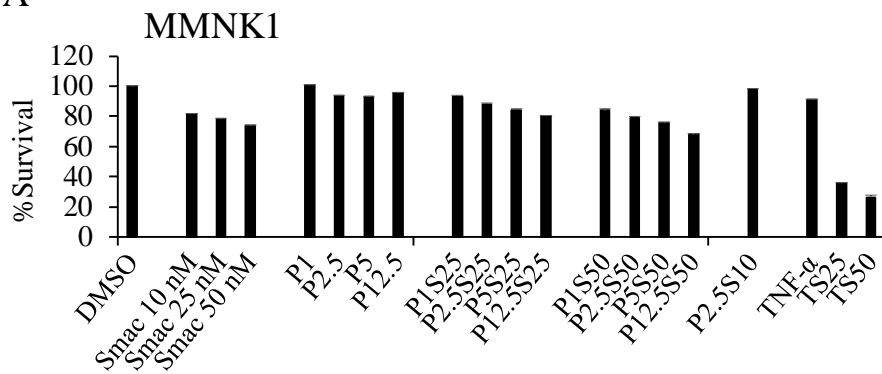

| MNNK1                             |      | CI index |       |       |
|-----------------------------------|------|----------|-------|-------|
| Smac (nM)                         |      | 10       | 25    | 50    |
| Poly(I:C)<br>( $\mu\text{g/ml}$ ) | 1    | ND       | 69.09 | 17.11 |
|                                   | 2.5  | 16.51    | 52.14 | 3.13  |
|                                   | 5    | ND       | 9.16  | 1.18  |
|                                   | 12.5 | ND       | 3.12  | 0.99  |

B

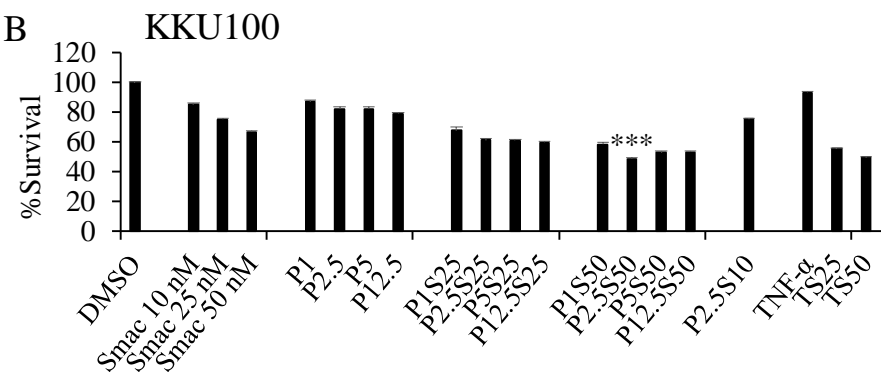

| KKU100                            |      | CI index |      |             |
|-----------------------------------|------|----------|------|-------------|
| Smac (nM)                         |      | 10       | 25   | 50          |
| Poly(I:C)<br>( $\mu\text{g/ml}$ ) | 1    | ND       | 0.58 | 0.61        |
|                                   | 2.5  | 0.53     | 0.38 | <b>0.34</b> |
|                                   | 5    | ND       | 0.39 | 0.45        |
|                                   | 12.5 | ND       | 0.41 | 0.47        |

C

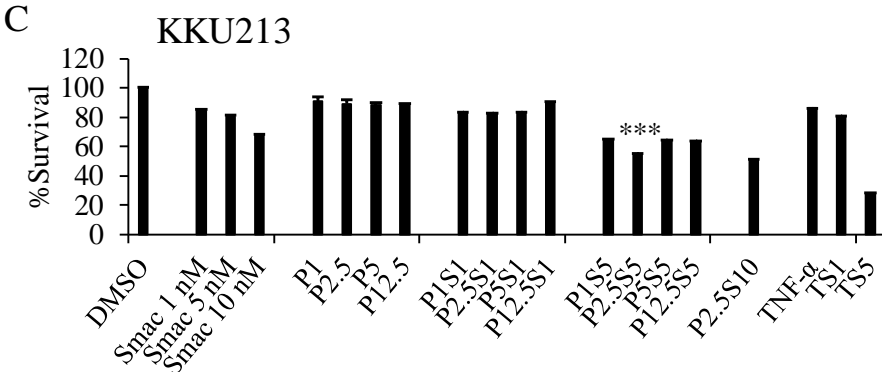

| KKU213                            |      | CI index |             |      |
|-----------------------------------|------|----------|-------------|------|
| Smac (nM)                         |      | 1        | 5           | 10   |
| Poly(I:C)<br>( $\mu\text{g/ml}$ ) | 1    | 0.64     | 0.20        | ND   |
|                                   | 2.5  | 0.56     | <b>0.07</b> | 0.49 |
|                                   | 5    | 0.65     | 0.19        | ND   |
|                                   | 12.5 | 1.14     | 0.17        | ND   |

**Fig. S5. TLR3 ligand and Smac mimetic synergistically induce cell death in CCA cell lines.** (A) MMNK1, (B) KKU100, and (C) KKU213 were pretreated with indicated concentration of Smac mimetic and were transfected with different concentrations of Poly(I:C) (1, 2.5, 5, and 12.5  $\mu\text{g/ml}$ ) for 24 h. Cell viability was determined by MTT assay. The Chou-Talalay method was used to calculate combination index (CI) where  $C > 1$  antagonism,  $CI = 0.9-1$  additive, and  $CI < 0.9$  synergism. Data from three independent experiments was presented as mean  $\pm$  S.D.; \*  $p < 0.05$ , \*\*  $p < 0.01$ , \*\*\*  $p < 0.001$ .

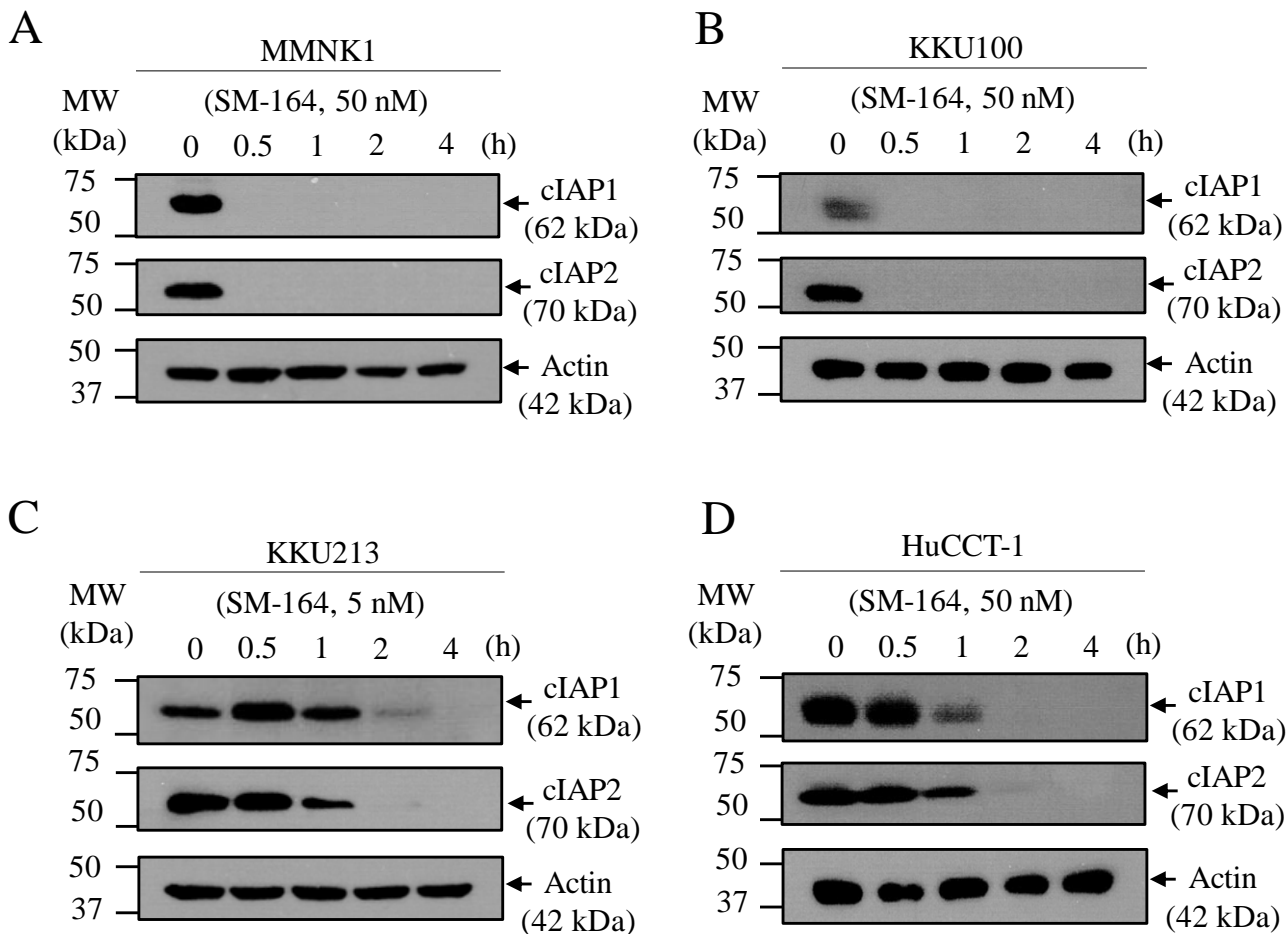

**Fig. S6. Degradation of cIAP1 and cIAP2 by Smac mimetic, SM-164.** (A) MMNK1, (B) KKU100, (C) KKU213, and (D) HuCCT-1 cells were treated with Smac mimetic at indicated concentrations and time points. The expression of cIAP1 and cIAP2 was determined by Western blot analysis.  $\beta$ -actin was served as loading control.

A

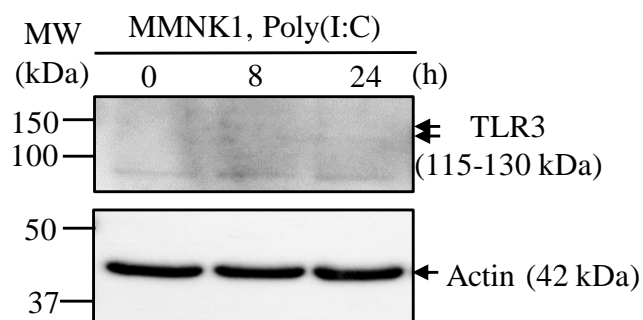

B

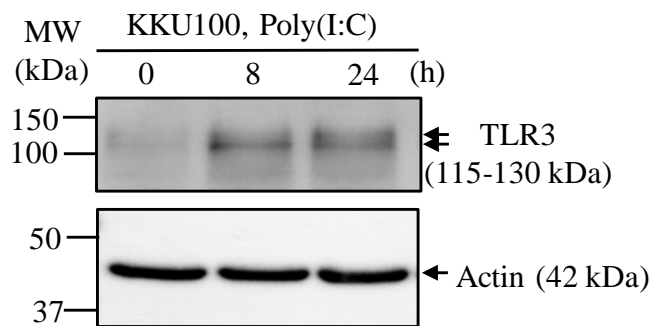

C

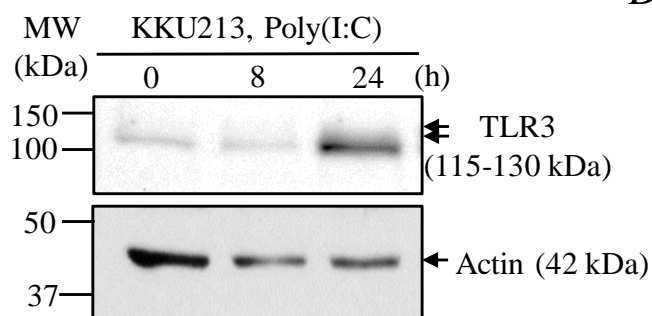

D

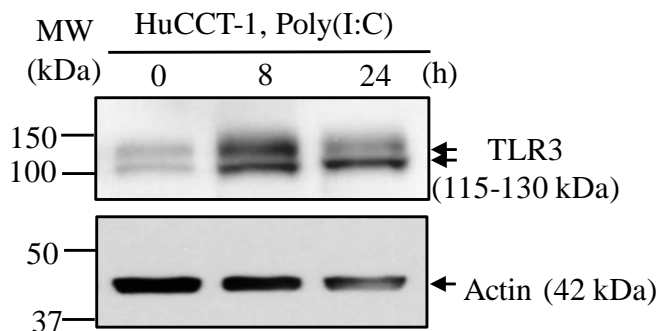

**Fig. S7. Upregulation of TLR3 by Poly(I:C).** (A) MMNK1, (B) K KU100, (C) K KU213, and (D) HuCCT-1 cells were transfected with 2.5  $\mu\text{g/ml}$  Poly(I:C) at indicated time points. The expression of TLR3 was determined by Western blot analysis.  $\beta$ -actin was served as loading control.



A

KKU100

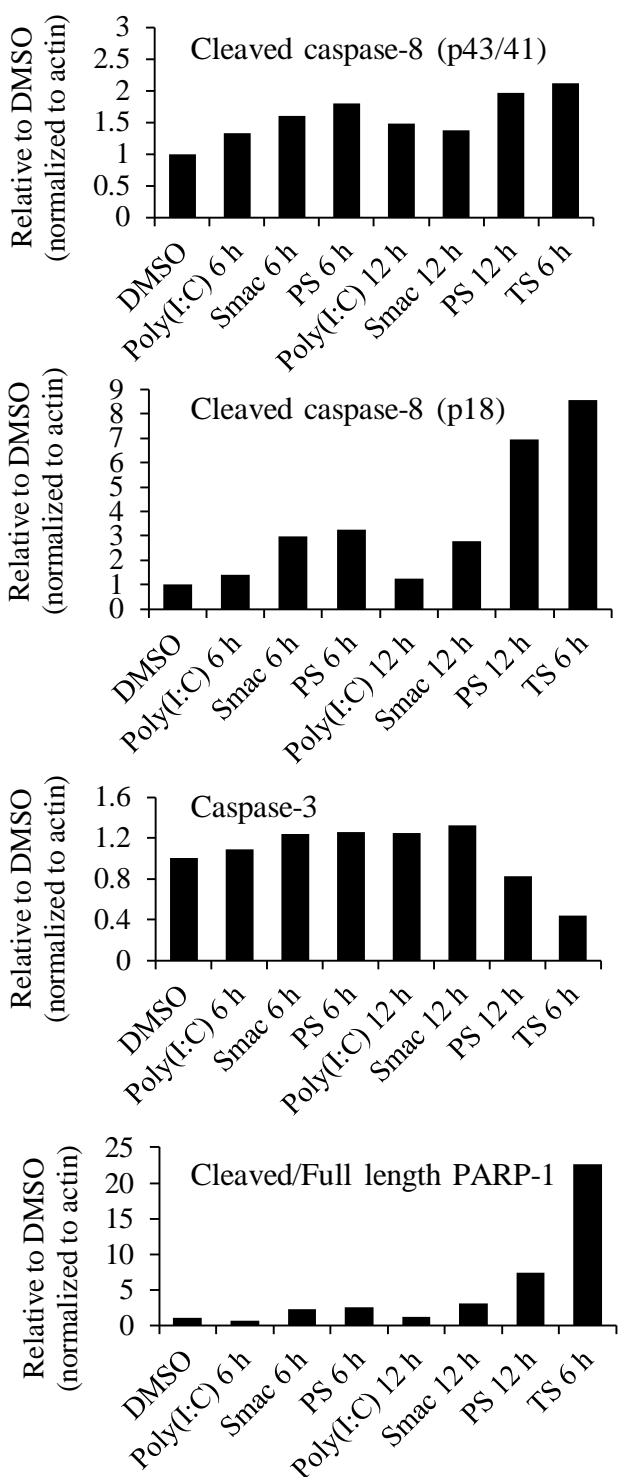

B

KKU213

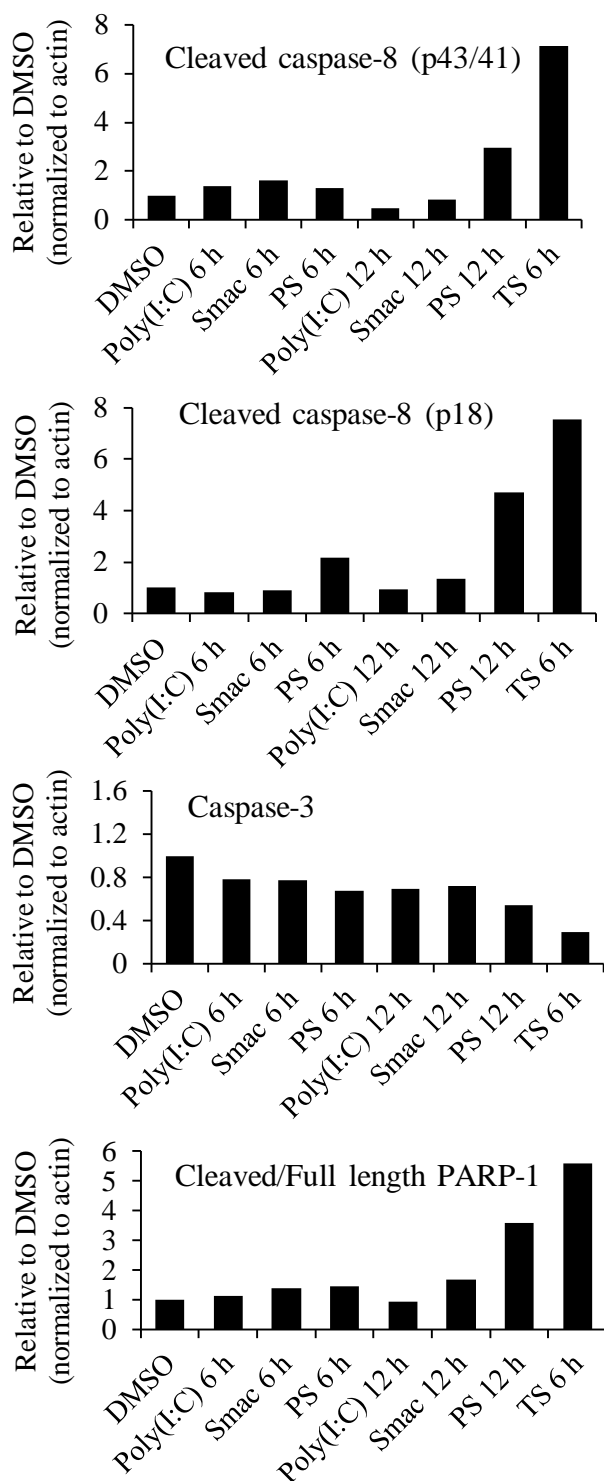

**Fig. S8. Densitometry of representative Western blot in Figure 2b.** (A) KKU100 and (B) KKU213, Western blot bands of cleaved caspase-8 (p43/p41), cleaved caspase-8 (p18), caspase-3, cleaved/full length PARP1 were analyzed by densitometry. Intensity of each band was normalized to actin and presented as fold changes relative to DMSO with its mean set to 1.

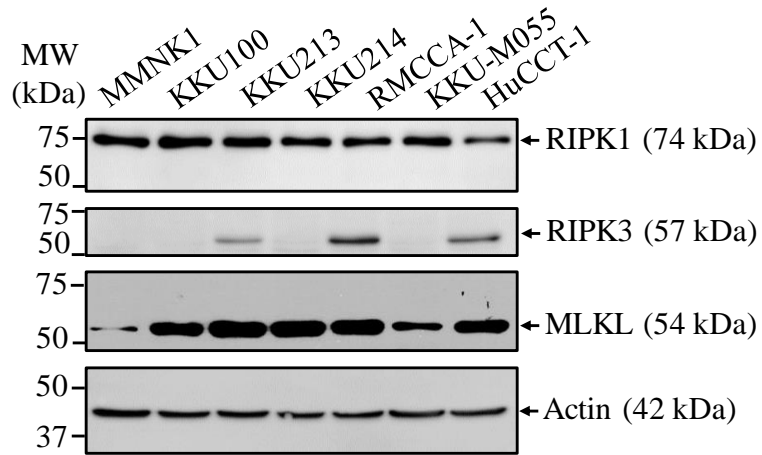

**Fig. S9. The expression of key necroptotic proteins, RIPK1, RIPK3, and MLKL.** Six CCA cell lines and a nontumor cholangiocyte, MMNK1 cell lysates were collected and subjected to Western blot analysis.  $\beta$ -actin was served as loading control.

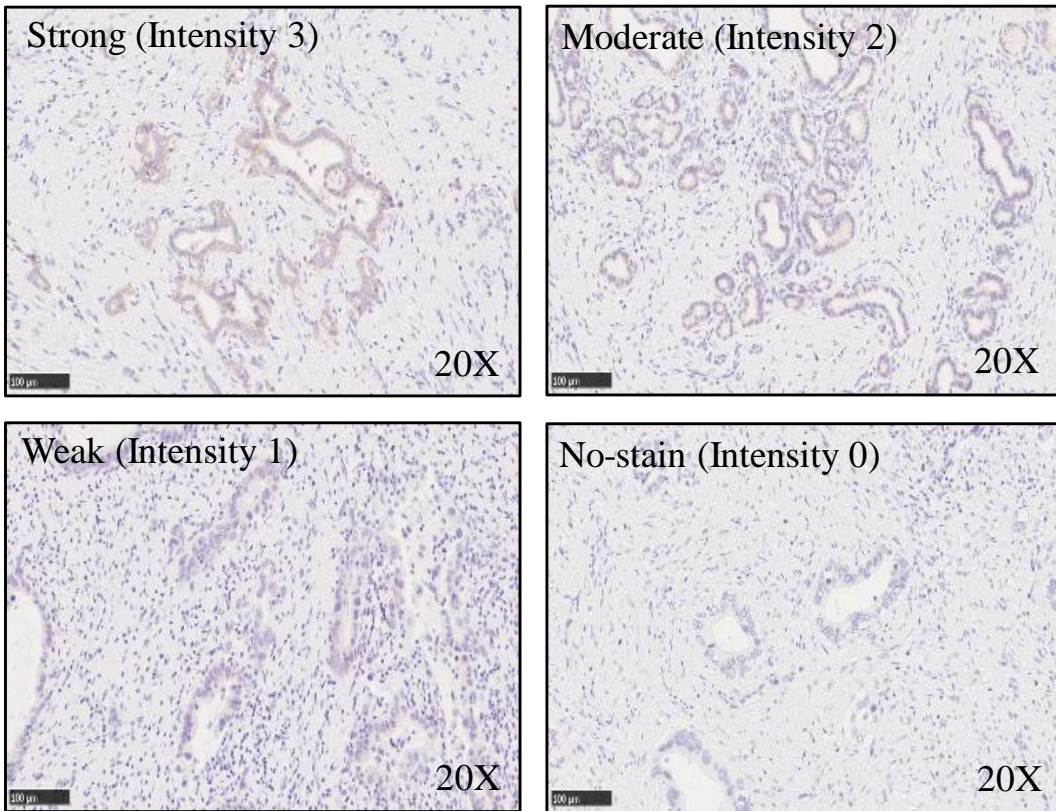

**Fig. S10.** The representative immunohistochemical staining of RIPK1 scored as 3 for strong staining, 2 for moderate staining, 1 for weak staining and 0 for no staining.

Disease free survival (DFS)

A

TLR3

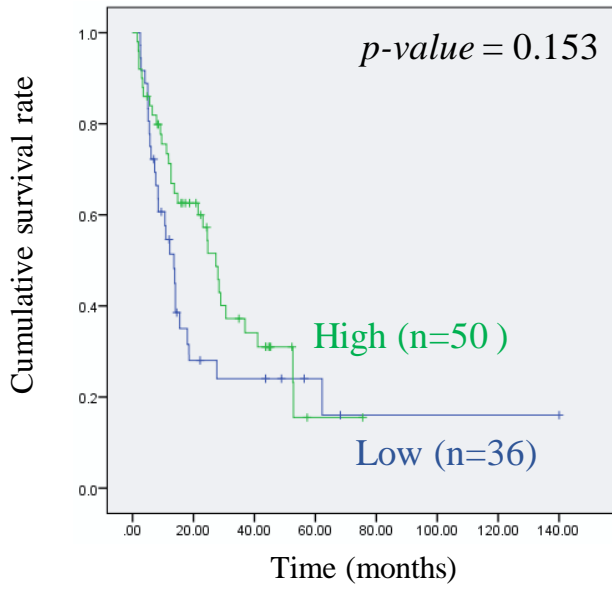

RIPK1

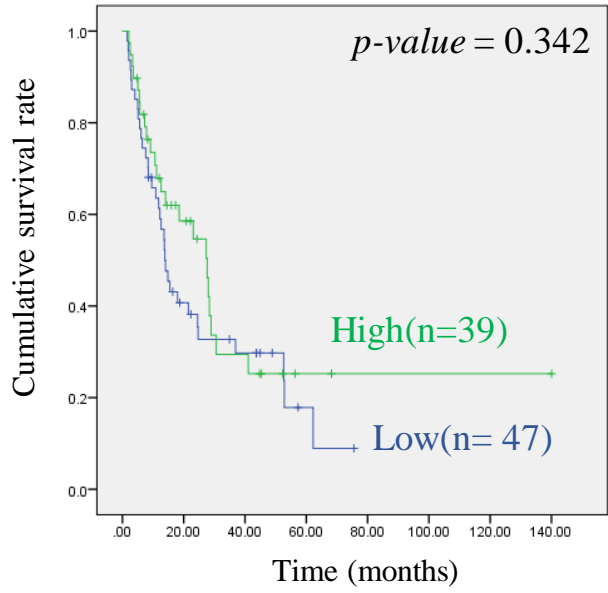

B

Overall survival (OS)

TLR3

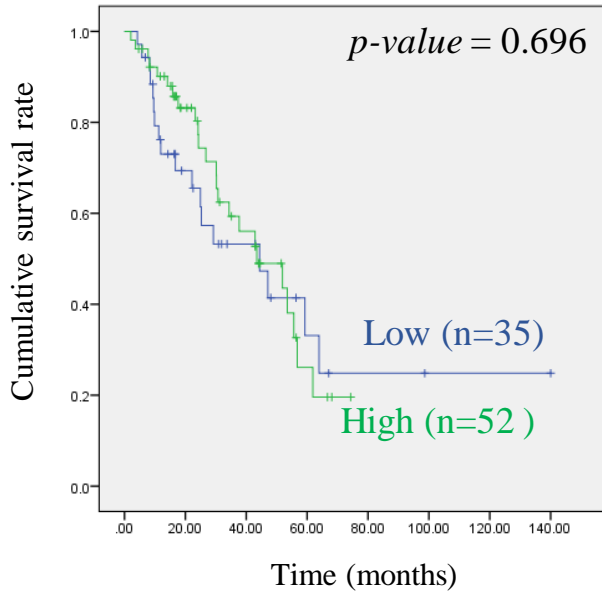

RIPK1

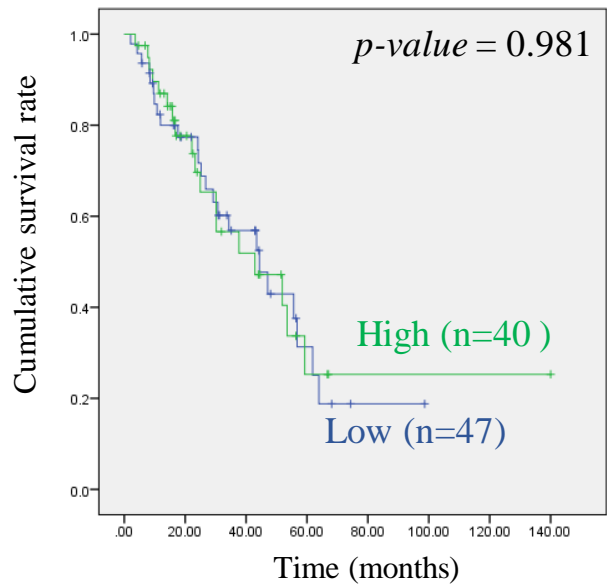

**Fig. S11. Kaplan-Meier survival analysis of TLR3 or RIPK1. (A) Disease free survival (B) Overall survival**

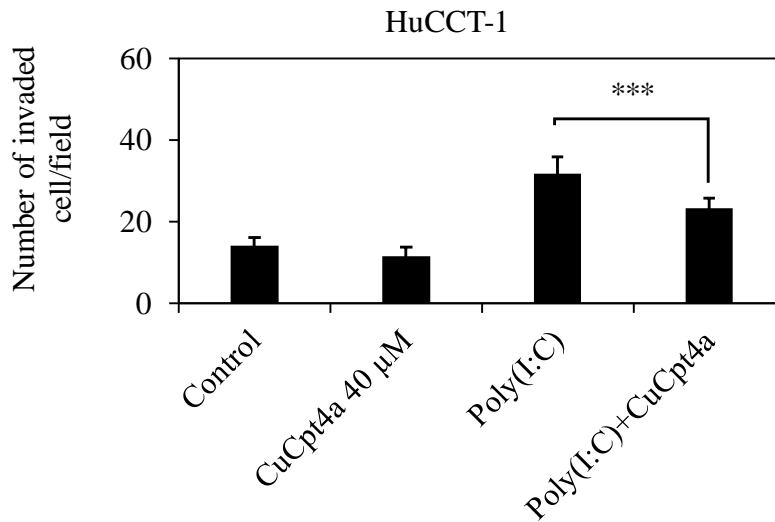

**Fig. S12. TLR3 inhibitor inhibits Poly(I:C)-induced invasion in HuCCT-1.** HuCCT-1 cells were pre-treated with DMSO control or 40  $\mu$ M CuCpt4a for 1 h followed by transfection with TurboFect or 2.5  $\mu$ g/ml Poly(I:C) and then subjected to invasion assays for 12 h. Number of invaded cells were counted. Data from two independent experiments was presented as mean  $\pm$  S.D. ; \*  $p < 0.05$ , \*\* $p < 0.01$ , \*\*\*  $p < 0.001$ .



A

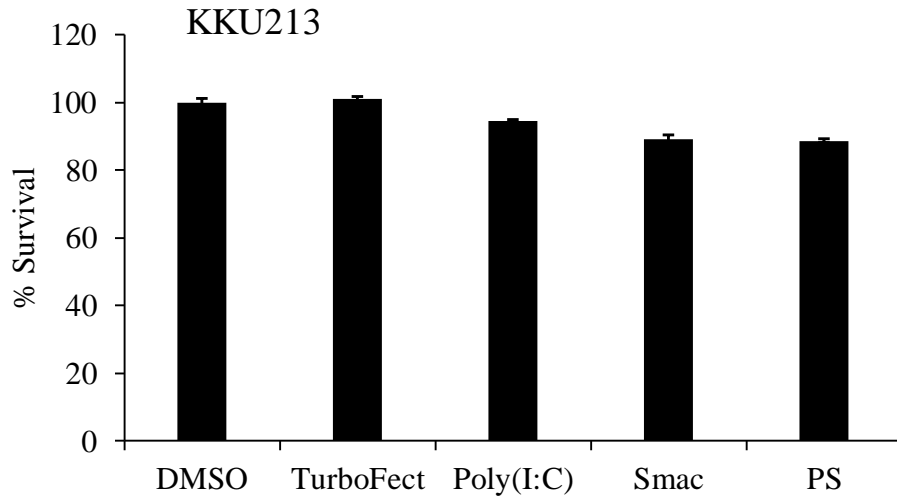

B

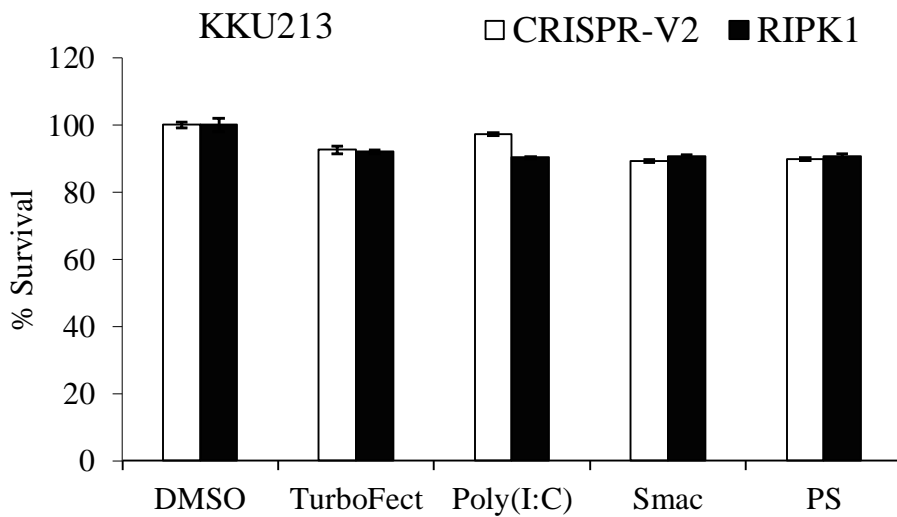

**Fig. S14. Cell viability/proliferation evaluated by MTT assay.** (A) KKU213 parental cells and KKU213 cells-expressing CRISPR control (CRISPR-V2) or CRISPR-RIPK1 (RIPK1) were pretreated with DMSO or 5 nM Smac mimetic (Smac) followed by transfected with TurboFect or 2.5  $\mu$ g/mL Poly(I:C) for 12 h. Cell viability was measured by MTT assay and % survival was calculated by normalizing treatment to control (DMSO). Data from two independent experiments was presented as mean  $\pm$  S.D.

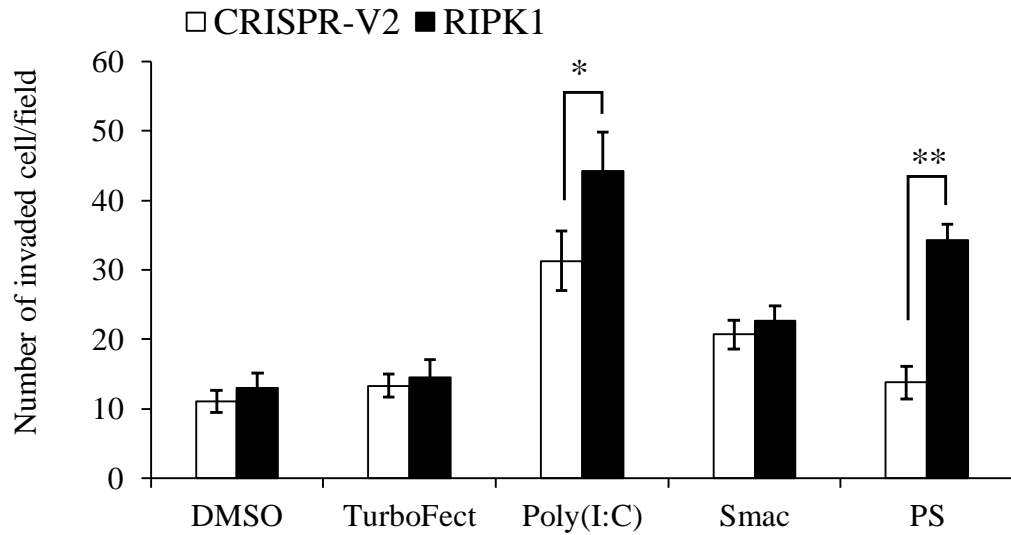

**Fig. S15. Smac mimetic reverses TLR3 ligand-induced invasion in HuCCT-1 cells.** HuCCT-1 cells-expressing CRISPR-V2 and CRISPR-RIPK1 were pre-treated with DMSO control or 50 nM Smac mimetic followed by transfection with TurboFect or 2.5  $\mu$ g/ml Poly(I:C) and then subjected to invasion assays for 12 h. Number of invaded cells were counted. Data from two independent experiments was presented as mean  $\pm$  S.D.; \*  $p < 0.05$ , \*\* $p < 0.01$ , \*\*\*  $p < 0.001$ .
